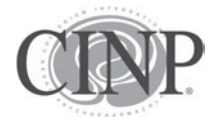

# Genetic approaches to understanding post-traumatic stress disorder

Lynn M. Almli<sup>1</sup>, Negar Fani<sup>1</sup>, Alicia K. Smith<sup>1</sup> and Kerry J. Ressler<sup>1,2</sup>

<sup>1</sup>Department of Psychiatry and Behavioural Sciences, Emory University School of Medicine, 4000 Woodruff Memorial Bldg., Atlanta, GA 30322, USA

<sup>2</sup>Howard Hughes Medical Institute, Chevy Chase, Maryland 20815, USA

## Abstract

Post-traumatic stress disorder (PTSD) is increasingly recognized as both a disorder of enormous mental health and societal burden, but also as an anxiety disorder that may be particularly understandable from a scientific perspective. Specifically, PTSD can be conceptualized as a disorder of fear and stress dysregulation, and the neural circuitry underlying these pathways in both animals and humans are becoming increasingly well understood. Furthermore, PTSD is the only disorder in psychiatry in which the initiating factor, the trauma exposure, can be identified. Thus, the pathophysiology of the fear and stress response underlying PTSD can be examined and potentially interrupted. Twin studies have shown that the development of PTSD following a trauma is heritable, and that genetic risk factors may account for up to 30–40% of this heritability. A current goal is to understand the gene pathways that are associated with PTSD, and how those genes act on the fear/stress circuitry to mediate risk *vs.* resilience for PTSD. This review will examine gene pathways that have recently been analysed, primarily through candidate gene studies (including neuroimaging studies of candidate genes), in addition to genome-wide associations and the epigenetic regulation of PTSD. Future and on-going studies are utilizing larger and collaborative cohorts to identify novel gene candidates through genome-wide association and other powerful genomic approaches. Identification of PTSD biological pathways strengthens the hope of progress in the mechanistic understanding of a model psychiatric disorder and allows for the development of targeted treatments and interventions.

Received 15 January 2013; Reviewed 7 March 2013; Revised 2 July 2013; Accepted 22 August 2013;

First published online 8 October 2013

**Key words:** Anxiety, epigenetics, neuroimaging, psychiatry, stress.

## Introduction

Epidemiological studies worldwide have documented a high rate of traumatic events including life-threatening accidents, rape, combat, physical violence, witnessing the death or injury of others and natural disasters. Several clinical and demographic risk factors that increase the risk of developing post-traumatic stress disorder (PTSD) in trauma survivors have been identified; these include female gender, severity and duration of the trauma, peritraumatic dissociation, previous or comorbid psychiatric disorder, childhood abuse and neglect, and lack of family or social support (Gillespie et al., 2009a).

PTSD is the fifth most common of the major psychiatric disorders, with an overall lifetime prevalence rate of ~8% in the United States (Keane et al., 2009). PTSD is approximately twice as common in women, and prevalence rates correlate with trauma exposure rates (Pratchett et al., 2010; Trevillion et al., 2012). Prospective studies indicate that the majority of trauma victims experience the

cardinal symptoms of re-experiencing, avoidance and hyper-arousal immediately following trauma, but for many victims, these symptoms abate and eventually disappear (Rothbaum et al., 1992). For a significant minority, symptoms persist and develop into syndromal PTSD. Chronic PTSD is associated with significant comorbidity (e.g. major depression, substance and alcohol abuse, panic disorder), mortality (suicide, medical comorbidity, reduced life expectancy), as well as disability in daily activities, reduced vocational productivity and increased health care utilization (Brunello et al., 2001; Gillespie et al., 2009b; Weiss et al., 2011).

Over the last several years, there has been increased interest in PTSD genetics and epigenetics to identify genes that may suggest who will develop PTSD or how best to treat the disorder. Because of the complexity of defining PTSD for genetic studies, many rely on intermediate phenotypes (Meyer-Lindenberg and Weinberger, 2006) or endophenotypes (Gottesman and Gould, 2003), which may be more directly related to relevant gene action and thus enhance biologically robust gene discovery. Recently, neuroimaging has been leveraged as an intermediate phenotype with exceptional results. This article will review and summarize recent research on

Address for correspondence: K. Ressler, Yerkes National Primate Research Centre, Emory University, 954 Gatewood Dr, Atlanta, GA 30329, USA.  
Tel.: (404) 727-7739 Fax: (404) 727-8070 Email: kressle@emory.edu

genetic approaches to understanding PTSD risk and resilience, including studies that employed epigenetics and/or neuroimaging methods.

### Heritability

One of the most intriguing questions in PTSD is why only 20–30% of exposed subjects develop PTSD following trauma exposure. Like other medical and psychiatric disorders, it is clear that a component of this differential risk is genetic. Based on twin studies, heritability appears to account for 30–40% of the variance contributing to risk for PTSD (True et al., 1993; Xian et al., 2000; Stein et al., 2002b; Koenen et al., 2003, 2005). Notably, part of the variance contributed by gene-environment interactions is estimated as an environmental contribution. Thus, the overall genetic contribution to this disorder may be underestimated. Data from these studies suggest that temperament as well as other heritable factors contribute to increased risk of exposure to traumatic events. A growing number of twin studies are designed to more clearly identify and understand specific biological mechanisms underlying heritable risk and resilience to PTSD (Afifi et al., 2010).

### Candidate gene studies

To date, genetic studies have focused primarily on candidate genes identified based on our current understanding of PTSD neurobiology. In general, these studies suggest a complex interaction between genetic and environmental factors. Further, many of the identified genetic polymorphisms are in promoter or other regulatory regions and not necessarily in coding regions of a gene (e.g. Poulton et al., 2008). Many reviews of candidate gene association studies for PTSD have been published to date (Broekman et al., 2007; Amstadter et al., 2009a; Norrholm and Ressler, 2009; Cornelis et al., 2010; Amstadter, 2012; Bomyea et al., 2012; Domschke, 2012; Mehta and Binder, 2012; Skelton et al., 2012; Digangi et al., 2013). Thus, this review will emphasize current findings on the genetics of PTSD, including genetic variants in the serotonergic and dopaminergic systems, hypothalamic-pituitary-adrenal (HPA) axis, and finally variants in other genes related to neurotransmission, neuromodulation and stress physiology (see below).

#### *Serotonergic system candidate genes*

Dysregulation of brain serotonergic systems has been implicated in the pathophysiology of PTSD (e.g. Southwick et al., 1994; Anger et al., 1999); indeed, this pathway represents the most studied candidate in PTSD. Among its many functions throughout the brain, serotonin regulates emotional responding and general emotionality; moreover, the serotonergic acting drugs

remain the first-line treatment for anxiety and depressive disorders and are the only currently available FDA-approved medications for PTSD.

Since the landmark study by Caspi et al. (2003), the most widely studied polymorphism in this system is located in the promoter region of the serotonin transporter (*SLC6A4*, rs25531, *5-HTTLPR*). The *5-HTTLPR* polymorphism contains two alleles, L (long) and S (short), and alters *SLC6A4* transcription; for instance, the S-allele reduces serotonin transporter gene expression and function leading to reduced serotonin uptake (Lesch et al., 1996). Though main effects of this polymorphism have been demonstrated (Lee et al., 2005; Thakur et al., 2009), most studies indicate that risk is associated with genotype (mainly S-allele carriers) and high trauma/stress (Kilpatrick et al., 2007; Grabe et al., 2009; Koenen et al., 2009; Xie et al., 2009, 2012; Kolassa et al., 2010b; Wang et al., 2011; Mercer et al., 2012). In contrast, several studies have reported no association (Mellman et al., 2009; Sayin et al., 2010). Complicating the issues of association studies with *5-HTTLPR* is that the polymorphism has been found to be tri-allelic ( $L_A/L_C/S$ ) in that a third functional allele ( $L_C$ ) has been identified (Nakamura et al., 2000); thus, earlier association studies may not reflect the full range of genetic variation (Kenna et al., 2012). Another variant in the serotonin system, the serotonin receptor 2A polymorphism (rs6311), has also been found to be associated with PTSD (Lee et al., 2007; Mellman et al., 2009).

#### *Dopaminergic system candidate genes*

Dysregulation of dopaminergic neurotransmission has also been implicated in the pathophysiology of PTSD (Yehuda et al., 1992; Hamner and Diamond, 1993). Dopamine is involved in attention and vigilance, arousal, and sleep, all systems that are dysregulated in PTSD. A polymorphism in the gene encoding the dopamine transporter (*SLC6A3* also known as DAT or DAT1) has a 40-base pair repeat located on chromosome 5p15 (Vandenberg et al., 1992). Since the seminal study of Segman et al. (2002), there have been several published reports replicating the association of the 9-repeat (9R) allele of *SLC6A3* with PTSD (e.g. Drury et al., 2009), and at least one reporting no association (Bailey et al., 2010). Recent publications reported carriers of the 9R allele had increased risk of PTSD when compared to those with the 10R allele (Valente et al., 2011b; Chang et al., 2012a). Furthermore, their preliminary report suggested an increased risk for PTSD might be mediated by high methylation of the *SLC6A3* promoter locus (CpG site cg13202751) in 9R allele carriers.

The association between the dopamine receptor D2 (*DRD2*) and PTSD has also been examined with inconsistent results. *DRD2* contains rs1800497 (also known as Taq1A), a single nucleotide polymorphism (SNP) with T (A1) and C (A2) alleles (Grandy et al., 1989).

In Caucasian war veterans, the *A1*-allele was associated with PTSD (Comings et al., 1996), and with PTSD and heavy alcohol consumption (Young et al., 2002), but this finding was not replicated (Gelernter et al., 1999). No association between PTSD diagnosis or symptom severity and the *A1*-allele of *DRD2* (or *SLC6A3*) was reported in a civilian Armenian sample after the Spitak earthquake (Bailey et al., 2010). However, a current study reported a gene-gene interaction between the *DRD2* Taq1A *1A*-allele and the valine (Val)-66 allele of *BDNF* (rs6265), but no direct association between either polymorphism and the severity of PTSD symptoms in a South African population (Hemmings et al., 2013).

Genetic variants in dopamine beta-hydroxylase (*DBH*) represent a likely candidate for examining genetic contributions to anxiety disorders because of the role this enzyme plays in converting dopamine to norepinephrine as part of catecholamine synthesis (Cubells and Zabetian, 2004). A polymorphism in *DBH* (-1021C/T; rs1611115) has been shown to account for 35–52% of the variation in plasma-*DBH* activity (Zabetian et al., 2001). However, Mustapic and colleagues reported no main effect of this polymorphism with PTSD, but they did find that war veterans with PTSD who carried the CC genotype of the *DBH*-1021C/T variant had lower plasma *DBH* activity (Mustapic et al., 2007). These findings were replicated in a civilian sample of African Americans (Tang et al., 2010).

Catechol-O-methyltransferase (*COMT*) is a critical enzyme involved in the breakdown of the catecholamine neurotransmitters including dopamine, norepinephrine and epinephrine. Thus, variation in the level of *COMT* activity is an important mediator in the regulation of these neurotransmitter systems, which are likely to play a role in the hyper-arousal symptoms of PTSD, including inattention, hyper-vigilance and sleep disruption. *COMT* contains a functional polymorphism at codon 158 (rs4680) that substitutes the amino acid Val for methionine (Met), and is associated with a significant reduction in enzyme activity (Lachman et al., 1996). The Met158 allele is also associated with a decreased ability to extinguish conditioned fear (Lonsdorf et al., 2009), a putative trait of PTSD. A significant association between one or more copies of the Met158 allele and PTSD has been reported (Valente et al., 2011a), in addition to a gene-environment interaction between the Met158 allele and the number of traumatic event types in predicting PTSD (Kolassa et al., 2010a). Moreover, a recent study examining the intermediate phenotype of fear inhibition in PTSD found that individuals with the Met/Met genotype demonstrated impaired fear inhibition, which may be mediated by higher methylation in the *COMT* promoter region (Norrholm et al., 2013). Thus, regulation of *COMT* and subsequent catecholamine neurotransmitter cascades may be an important factor in fear processing for those with PTSD and similar psychiatric disorders.

### Hypothalamic-pituitary-adrenal axis candidate genes

PTSD is also characterized by dysregulation of the stress response system, such that activity of the hypothalamic-pituitary-adrenal (HPA) axis is altered and hyper-responsive to cortisol feedback (Yehuda et al., 1993; Yehuda, 2009). This stress dysregulation is thought to be associated with both physiological and psychological emotion dysregulation and stress hyper-responsiveness, which are common in PTSD. These HPA axis effects occur, in part, through enhanced sensitivity of the glucocorticoid receptor (GR)-mediated feedback mechanism that suppresses stress-induced cortisol release (van Zuiden et al., 2012). Two small studies reported associations between PTSD and cannabinoid receptor (*CNR1*) gene variants (NM\_016083 and NM\_033181; (Lu et al., 2008), and between a SNP in corticotropin-releasing hormone receptor-1 (*CRHR1*, rs12944712) and PTSD onset in paediatric injury patients (Amstadter et al., 2011). However, no significant associations were found between GR (*NR3C1*) polymorphisms (N363S and BclI) and PTSD diagnosis in a cohort of 118 Vietnam veterans (Bachmann et al., 2005).

The most promising candidate thus far is *FKBP5* (Binder et al., 2008; Xie et al., 2010; Mehta et al., 2011; Sarapas et al., 2011; Klengel et al., 2013), an important regulator of the stress system by altering GR sensitivity (Scammell et al., 2001). Binder and colleagues found that 4 SNPs in *FKBP5* (rs9296158, rs3800373, 1360780, rs9470080) interacted with child abuse severity to predict adult PTSD in a primarily African American civilian cohort (Binder et al., 2008). The initial interaction was partially replicated (rs9470080) in a population of African Americans with a history of childhood adversity (Xie et al., 2010). More recently, a polymorphism in *FKBP5* (rs1360780), that increases the risk of developing stress-related psychiatric disorders in adulthood, was found to be dependent on changes in DNA methylation occurring as a consequence of childhood trauma-dependent stress (Klengel et al., 2013).

Also regulating the stress response is the neuropeptide pituitary adenylate cyclase-activating polypeptide (*PACAP*), which functions in parts of the brain that mediate anxiety- and fear-related behaviours, and is directly involved in regulating corticotrophin releasing hormone (*CRH*) production (see review by Vaudry et al., 2009). Recently a genetic variant in the *PAC1* receptor (*ADCYAP1R1*; rs2267735) that disrupts a putative oestrogen response element has been found to be associated with PTSD in a primarily African-American cohort of women (Ressler et al., 2011). A follow-up study reported an interaction between genotype and total trauma load in a replicate sample of African-American females from the same population (Almli et al., 2013). Further, PTSD associates with alterations in peripheral blood DNA methylation and mRNA expression of the *ADCYAP1R1* transcript (Ressler et al., 2011). Although the association

with the *ADCYAP1R1* variant was not replicated among presumably less traumatized, African American and Caucasian populations (Chang et al., 2012b), an interaction between *ADCYAP1R1* genotype and childhood maltreatment may predict PTSD in females (Uddin et al., 2012).

The neurobiology of stress regulation, particularly with regard to the HPA axis and the regulation of CRH production and cortisol feedback, may underlie many of the symptoms of PTSD. Candidate gene studies targeting pathways within the HPA system have been productive, particularly with regards to the *FKBP5* pathway, which has been multiply replicated at the genetic, epigenetic, mRNA expression and protein levels of analysis.

### *BDNF candidate genes*

Brain derived neurotrophic factor (BDNF) is involved in the neural plasticity underlying the extinction of fear (Chhatwal et al., 2006; Heldt et al., 2007; Soliman et al., 2010) and recovery from stress, both of which are disrupted in PTSD. Based on its role in hippocampal-dependent learning and the neurobiology of anxiety and depression, the *BDNF* gene has been studied in relation to anxiety disorders such as PTSD (see Andero and Ressler, 2012). A nonconservative amino acid substitution (Val66Met, rs6265) has been identified in the *BDNF* on chromosome 11p14.1 (Sen et al., 2003); however, most studies have found no association (Olf et al., 2005; Lee et al., 2006; Zhang et al., 2006; Valente et al., 2011b). As mentioned previously, a significant interaction between *DRD2* Taq1A (rs1800497) and Val66Met (rs6265) predicts PTSD severity (Hemmings et al., 2013). Interestingly, a recent study in humans and rats suggests that *BDNF* over-expression may be a critical stress response underlying PTSD by showing that the Val66Met allele confers vulnerability to PTSD via startle data and plasma BDNF levels (Zhang et al., 2013). Furthermore, *BDNF* polymorphisms may be associated with response to treatment (Felmingham et al., 2013), consistent with its known role in mechanisms of extinction of fear. Studies combining neuroimaging with genetics may shed more light on the association with BDNF and PTSD.

### *Additional candidate genes*

Several other candidate genes have been studied in relation PTSD genetics, but with limited success. A recent review of the link between neuropeptide Y (NPY) and PTSD has been published (Sah and Geraciotti, 2012), and highlights research on this stress-resilience factor. *NPY* has been identified as a risk locus for anxiety and anxiety disorders (e.g. Kaabi et al., 2006), and it is thought that it has a direct role in decreasing fear states and enhancing fear extinction (Gutman et al., 2008). However, the one published genetic study did not find an association between a polymorphism in *NPY* (Leu7Pro; rs16139)

and PTSD in a population of Caucasian combat veterans (Lappalainen et al., 2002).

Monoamine oxidase B (MAO-B) catabolizes dopamine, tyramine, tryptamine and other monoamines that are involved in arousal, vigilance and attention, as outlined above (Oreland, 2004). The *MAOB* intron 13 polymorphism (a G/A substitution; rs1799836) has been studied in relation to PTSD because *MAOB* expression in platelets has been implicated in several psychopathologies and may represent a biomarker for vulnerability to psychiatric illness (Schalling et al., 1987; Oreland, 2004; Ruchkin et al., 2005). However, a study on a potential association between *MAOB* polymorphisms and PTSD has been inconclusive (Pivac et al., 2007).

The inhibitory neurotransmitter,  $\gamma$ -aminobutyric acid (GABA), has been implicated in animal studies of fear and anxiety (Delgado et al., 2006). Of many genes with differential expression levels depending on PTSD status (Segman et al., 2005), one GABA<sub>A</sub> receptor gene has been studied in relation to PTSD. Three polymorphisms in the GABA<sub>A</sub> receptor subunit alpha 2 (*GABRA2*) had significant interactions with childhood trauma to predict PTSD (Nelson et al., 2009).

Apolipoprotein E (ApoE), a 34 kDa protein that regulates the binding of lipoproteins to the low-density lipoprotein receptor, is most commonly known due to its role in cardiovascular and Alzheimer's diseases. As with many psychiatric disorders, however, ApoE may also play a role in neuronal and glial responding to stress dysregulation. The gene *APOE* is polymorphic with three major isoforms: *ApoE2* (cys130, cys176), *ApoE3* (cys130, arg176), and *ApoE4* (arg130, arg176) (Ghebranious et al., 2005). A significant association between the *ApoE2* allele and impaired memory and greater re-experiencing symptoms has been found in combat-exposed PTSD patients (Freeman et al., 2005).

Regulator of G-protein signalling 2 (*RGS2*) is part of a protein family that has been extensively implicated in neural plasticity associated with learning and memory, and thus may be critical for the dysregulated cognitive functioning associated with PTSD and in impaired recovery following trauma. Indeed, *RGS2* variants have been associated with anxiety (Leygraf et al., 2006; Smoller et al., 2008). An association with *RGS2* (rs4606) and PTSD was found under conditions of high stress and low social support (Amstadter et al., 2009b); further support of this association is found with neuroimaging (see below).

Overarching statements on the genetic underpinnings of PTSD through candidate gene studies are premature at this point, although several genes hold promise as potential biomarkers. Despite the increased number of studies on the genetics of PTSD over the years, there clearly have been limitations in study design and non-reproducibility of findings (Amstadter, 2012). Moreover, PTSD can be examined both categorically and continuously, and important confounding factors, such as sex,

race or trauma history are not consistently addressed in all studies making it difficult to draw conclusions. Interestingly, a method using a cumulative risk score showed that association with 4 or more risk alleles of candidate genes *FKBP5* (rs9470080), *COMT* (rs4680), and cholinergic receptor nicotinic alpha-5 (*CHRNA5*; rs16969968) conferred ~7 times the risk of PTSD (Boscarino et al., 2011). An additional study added *CRHR1* (rs110402) to the cumulative risk model and found both a main effect and interaction with level of trauma (Boscarino et al., 2012). Thus, it is clear across psychiatric disorders that these are not single gene disorders. Instead, they are complex, multi-genic disorders that will likely be best explained through multi-genic risk marker profiles of many identified gene pathways of small effect size (Psychiatric GWAS Consortium Coordinating Committee, 2009). The field still needs well-powered, hypothesis-neutral studies, such as large-scale, collaborative GWAS approaches, as described below, to identify more robust candidate genes and to identify the important neurobiological targets for research on understanding and treating PTSD. There is anticipation that as genetic markers are more clearly defined and replicated, we may eventually assign cumulative risk for PTSD based on biomarkers combined with trauma exposure, not unlike the medical determination of cardiovascular risk based on BMI, cholesterol, blood pressure, sedentary lifestyle and smoking history.

### Genome-wide association studies

While candidate pathways that contribute to PTSD tend to be well supported in the literature, it is not trivial to select candidate genes or polymorphisms that can meet stringent definitions of association. Thus, a genome-wide association study (GWAS) can be employed to identify disease-associated variants independently of what is known about its pathophysiology.

The first GWAS of PTSD was recently published, and significant association with a variant in the retinoid-related orphan receptor alpha (*RORA*) was found (Logue et al., 2012). *RORA* is a particularly interesting candidate in light of its putative associations with attention-deficit hyperactivity disorder (Neale et al., 2008), bipolar disorder (Le-Niculescu et al., 2009), autism (Nguyen et al., 2010) and, most notably, depression (Garriock et al., 2010). In relation to PTSD, Logue and colleagues suggest that alterations in *RORA* levels, because of inherited genetic variation, may reduce the capacity of neurons to respond to the biochemical stressors (oxidative stress, steroid hormone elevations and inflammation) induced by traumatic stress (Logue et al., 2012). In a discovery sample of Caucasian US military veterans and their partners (295 cases and 196 controls), the authors found one SNP in *RORA* (rs8042149) that remained significant after correction for multiple testing and had an odds ratio over 2.0. Examination of this

SNP in African Americans from the same cohort (43 cases and 41 controls) did not replicate the association with rs8042149; however, other SNPs within *RORA* were nominally associated ( $p < 0.05$ ) with PTSD. The association was not replicated with data from the Detroit Neighbourhood Health Study (100 cases and 421 controls; African Americans), but other nominally significant SNPs in *RORA* were found. Of note is that the original association between the *RORA* SNP rs8042129 and PTSD in a cohort of Florida hurricane survivors was recently published (Amstadter et al., 2013). These studies, including initial GWAS 'hit' and replication in external cohorts, are a promising first step in determining genetic risk for PTSD. GWAS studies of over 50000 subjects (including cases and traumatized controls) are ongoing in civilians and veterans cohorts, and a PTSD subgroup is actively being planned within the Psychiatric GWAS Consortium (<https://pgc.unc.edu/>).

### Epigenetics

Epigenetic studies may also provide insight into the molecular mechanisms that associate with PTSD or potential targets for therapies. Much like sequence variants can influence the expression of a gene, epigenetic patterns dictate the timing and magnitude of gene expression by restricting areas of the genome available for transcription (Bonasio et al., 2010). However, some parts of the epigenome change in response to the environment and are potentially reversible (Feinberg, 2007; Feil and Fraga, 2011).

The field of epigenetics encompasses the study of covalent and non-covalent modifications of DNA, its associated proteins and RNA transcripts that regulate gene expression. To protect and organize DNA in the nucleus of a cell, it is wrapped around packaging proteins (histones), which can be modified to influence transcription, chromatin conformation and cofactor recruitment (Annunziato, 2008; Bannister and Kouzarides, 2011). Histone modifications often correlate with changes in methylation of DNA at the 5' carbon of cytosine in the context of a cytosine phosphodiester guanine (CpG) dinucleotide, commonly called a CpG site. DNA methylation patterns vary throughout a gene based on the genetic architecture of a region. Increased methylation of a promoter region often correlates with decreased expression of that gene (Bonasio et al., 2010) while intragenic or intronic methylation may regulate alternative promoters and enhancers that define alternative transcripts (Maunakea et al., 2010). DNA methylation is the most common epigenetic modification examined in studies of PTSD.

It is thought that the sensitization of the stress-response pathways is mediated by long-term epigenetic alterations of both histones and DNA. Animal studies that focus on epigenetic changes accompanying fear conditioning and extinction provide insight into PTSD, and this topic

has been recently reviewed (Zovkic and Sweatt, 2013). In humans, epigenetic mechanisms of stress-sensitization and PTSD have been studied in highly traumatized populations (e.g. Koenen et al., 2011). Studies have identified DNA methylation differences in multiple genes across the genome related to immune function and inflammation of those with PTSD compared to controls (Uddin et al., 2010; Smith et al., 2011). For example, Roth and colleagues reported that early maltreatment of rat pups produced increased methylation of *BDNF* that resulted in persistent decreases in gene expression in the adult prefrontal cortex (Roth et al., 2009) while Smith and colleagues reported increased methylation of a CpG site in *BDNF* and peripheral blood of adults with PTSD (Smith et al., 2011). Consistent with this, PTSD cases and controls can also be delineated by measuring genomic DNA methylation globally (Smith et al., 2011; Rusiecki et al., 2012). Together, these results suggest that psychosocial stress may alter global and gene-specific DNA methylation patterns potentially associated with peripheral immune dysregulation. Though it is not clear to what degree methylation changes in the blood correlate with those in the brain, a recent study suggests consistency of many genes (Davies et al., 2012).

Interestingly, stress experienced during prenatal development may also contribute to PTSD risk. Indeed maternal and neonatal cortisol levels correlate at delivery (Smith et al., 2011), but clinical investigations suggest that high levels of stress during pregnancy induce epigenetic changes in HPA axis genes that may contribute to psychopathology in offspring (Oberlander et al., 2008; McGowan et al., 2009). Along these lines, studies following the offspring of women who suffered traumatic events during pregnancy, such as the Dutch Hunger Winter or the September 11, 2001 attack on the World Trade Centre, report physiological and gene expression differences in the offspring (Yehuda et al., 2005, 2009; Roseboom et al., 2006; Stein et al., 2009) that may be mediated by epigenetic changes in the offspring (Heijmans et al., 2008).

A recent study revealed that maltreatment during childhood correlated with differences in DNA methylation and gene expression when PTSD subjects who were abused as children were compared to PTSD subjects with no history of abuse (Mehta et al., 2013). Similar differences in DNA methylation and gene expression were also observed based on age, gender, ethnicity, early-life socioeconomic status and psychosocial stress (Lam et al., 2012). These studies suggest that the epigenome responds to the environment and that there may be distinct and highly individualized biological pathways that promote PTSD. Given this phenotypic heterogeneity, genetic studies of intermediate phenotypes (i.e. neuroimaging), may be the most direct path to identifying genes that contributed to PTSD.

## Neuroimaging genetics

In general, individuals with PTSD have been shown to exhibit specific patterns of information processing, including attentional biases for trauma-relevant cues (Bryant and Harvey, 1997; Dalgleish et al., 2003; Fani et al., 2012; Wald et al., 2013), and impairments in sustained attention, declarative and working memory as compared to individuals without PTSD (Bremner et al., 1993, 2004; Uddo et al., 1993; Yehuda et al., 1995; Vasterling et al., 1998, 2002; Gilbertson et al., 2001; Stein et al., 2002a; Koso and Hansen, 2006; Samuelson et al., 2006; Schweizer and Dalgleish, 2011; Dretsch et al., 2012). These phenomena may be relevant to particular patterns of neural response and structure that are characteristic of individuals with PTSD, including smaller hippocampal volumes (Bremner et al., 1995; Kitayama et al., 2005; Karl et al., 2006) and exaggerated amygdala response (Rauch et al., 2000; Armony et al., 2005; Shin et al., 2005; Bryant et al., 2008a,b). Together, these traits can be considered intermediate/endophenotypes. By characterizing gene-specific neurobiological traits associated with PTSD (Radant et al., 2001), neuroimaging genetics research may help identify intermediate phenotypes of PTSD that clarify the functional link between genes and disease phenotype (Glahn et al., 2007). An earlier review discusses structural MRI findings as related to PTSD (Damsa et al., 2009); however, we have summarized recent studies of neuroimaging data on candidate genes for PTSD and related phenotypes (see also recent reviews: Martin et al., 2009; Domschke and Dannlowski, 2010), which underscore the utility of the methodology for understanding potential mechanisms and therapy for psychiatric disorders such as PTSD (Table 1).

The growing neuroimaging literature relevant to intermediate phenotypes for PTSD has examined associations between allelic variations in *5-HTTLPR*, *BDNF*, *FKBP5*, *COMT*, and *NPY* genes, and brain structure and function in healthy populations and individuals with affective disorders. As noted earlier, these genes appear to play a role in PTSD pathogenesis, exerting effects on specific brain structures and their corresponding functions. Regarding function, a majority of fMRI studies relevant to PTSD intermediate phenotypes have employed paradigms that include emotionally salient stimuli, typically, photographs of facial expressions, to examine gene-specific responses to these stimuli in basic emotion processing circuits. Studies of brain structure have primarily focused on regions that have previously demonstrated dysfunction in PTSD populations: the hippocampus and amygdala; these regions have been implicated in the expression and extinction of learned fear, as well as explicit learning and declarative memory processes.

Studies of the serotonin transporter gene, *5-HTTLPR*, currently dominate this literature. Many of these studies have focused on SNP rs25531, largely indicating

heightened amygdala activation in S-allele carriers in response to cues that signal threat (Morey et al., 2011; Alexander et al., 2012; Drabant et al., 2012). Indeed, one study found this pattern of activation to be particularly apparent in males with SS genotype who reported higher exposure to potentially traumatic experiences (Alexander et al., 2012). Some structural studies have likewise indicated that the S-allele may represent 'risk' for lower hippocampal volume (Eker et al., 2011), particularly in combination with childhood abuse history (Frodl et al., 2010; Everaerd et al., 2012); however, this finding has not been uniform across all studies (Cole et al., 2011).

A number of neuroimaging studies have examined how allelic variants of *FKBP5*, *COMT* and *NPY* associate differentially with behavioral and neural responses to threat-relevant facial expressions; prior studies of PTSD have shown exaggerated limbic responses to these cues (Rauch et al., 2000; Armony et al., 2005; Shin et al., 2005; Bryant et al., 2008a,b). Two ROI-based studies indicate that heightened activation in the amygdala (White et al., 2012) and hippocampus (Fani et al., 2013) to threat cues in carriers of risk alleles for various *FKBP5* polymorphisms identified in previous studies (Binder et al., 2008). White et al. (2012) found these effects to be attributable to a gene by environment interaction; Fani et al. (2013) did not observe interactive effects, but found that, compared to individuals without the risk allele, *FKBP5* risk allele carriers (for SNP rs1360780) demonstrated an attentional bias toward threat cues and corresponding increases in hippocampal activation. Heightened amygdala responses to threat cues (angry and fearful faces) have also been observed in risk allele carriers for *COMT* (specifically, Val-allele carriers for SNP rs4680) (Domschke et al., 2012) and *NPY* (Domschke et al., 2010b).

Smaller hippocampal volumes represent putative structural endophenotypes for PTSD, as observed in MRI studies of *5-HTTLPR*, *BDNF*, and *FKBP5* (Gatt et al., 2009; Frodl et al., 2010; Eker et al., 2011; Everaerd et al., 2012; Carballedo et al., 2013; Fani et al., 2013), with some of these findings reflecting gene by environment (e.g. childhood maltreatment) interactions (Gatt et al., 2009; Everaerd et al., 2012; Carballedo et al., 2013). These structural differences between genotype groups are likely to have functional consequences, particularly with regard to learning and memory. In support of this, Gatt et al. (2009) found that Met-allele carriers for *BDNF* (rs2625) who were exposed to early life stress demonstrated poorer working memory in accordance with smaller hippocampal, as well as lateral prefrontal, volumes (Gatt et al., 2009).

The findings of these genetic neuroimaging studies have not been entirely consistent; this signals a need for replication in large samples, and likewise, examination of specific genetic effects among different demographic groups. For example, two statistically

well-powered studies did not observe associations between hippocampal volume and allelic variations in *5-HTTLPR* and *BDNF* among populations of healthy, depressed and anxious individuals (Cole et al., 2011; Mueller et al., 2013). Within studies of candidate genes, inconsistencies have also emerged between genotypes and patterns of neural structure and response, thus complicating the identification of a pure 'risk' genotype. In addition, it is likely that more than one gene influences the patterns of neural function and structure observed in these studies; thus, genome-wide and multiple candidate gene approaches may more precisely specify genetic associations with these phenomena. Causal inferences similarly cannot be made about findings in anxious/depressed populations; these cross-sectional studies cannot definitively extricate gene-related effects from disease sequelae. Further, a majority of extant studies have conducted statistical tests on specific regions of interest, particularly the hippocampus and amygdala; other prefrontal cortical regions, including aspects of the anterior cingulate, dorsolateral prefrontal cortex, are worthy targets for further exploration in neuroendophenotypic studies of PTSD. Complementary cognitive and behavioral data will also help shed light on the processes that are affected by functional and structural differences.

## Conclusions

As with many psychiatric disorders, the risk for PTSD following trauma has moderate genetic heritability. Identifying and understanding the gene pathways leading to differential risk for PTSD will enhance our ability to dissect the different components of PTSD development and recovery. Furthermore, combining neuroimaging with genetics provides a novel approach to understanding how dysregulated gene pathways affect neural systems involved in stress and fear processing that are thought to underlie PTSD pathophysiology. New developments in large-scale genome-wide associate studies, whole genome sequencing, copy number variants, epigenetic and gene expression analyses will soon allow for convergent genomic approaches to further define, in a hypothesis-neutral manner, gene pathways critically involved in PTSD. Until then, the genetics of PTSD have relied mainly on candidate studies, which have met with some success, specific examples of which have been reviewed herein. PTSD provides a fascinating case in biological psychiatry, in which the neural circuits are moderately well understood, robust animal models are present and the fields of molecular learning and memory are complementary. Through classic and convergent genomic approaches, a mechanistic understanding of risk and resilience in PTSD is achievable, and with that, insight into targeted treatment and prevention approaches should follow.

**Table 1.** Select publications on neuroimaging genetics with post-traumatic stress disorder (PTSD) patients or intermediate/endophenotypes of PTSD and candidate genes

| Reference              | Subjects/<br>phenotype            | Task                                                | Method | Region(s)<br>of interest                    | Gene                           | Findings                                                                                                                                                                                                                                                                                                                |
|------------------------|-----------------------------------|-----------------------------------------------------|--------|---------------------------------------------|--------------------------------|-------------------------------------------------------------------------------------------------------------------------------------------------------------------------------------------------------------------------------------------------------------------------------------------------------------------------|
| Alexander et al., 2012 | Male controls (48)                | Fearful face <i>vs.</i> fixation                    | fMRI   |                                             | 5-HTTLPR (rs25531)             | – G×E: Amygdala activation and amygdala/hypothalamus connectivity: SS males with a history of stressful life events>other genotype and environment groups                                                                                                                                                               |
| Drabant et al., 2012   | Female controls (48)              | Stress exposure task/<br>threat of electric shock   | fMRI   |                                             | 5-HTTLPR (rs75531)             | – Activation to ‘safe’ trials <i>vs.</i> shock anticipation: widespread increase in activation throughout brain, SS>LS>LL<br>– SS genotype: positive correlation between mPFC activation and anxiety<br>– L-allele carriers: negative correlation between insula activation and perceived success at regulating anxiety |
| Morey et al., 2011     | PTSD (22); trauma controls (20)   | Working memory                                      | fMRI   | vIPFC, amygdala, fusiform gyrus, dlPFC, LPC | 5-HTTLPR (rs16965628, rs25531) | – rs16965628: Diagnosis×gene interaction for vIPFC activation during exposure to trauma-relevant distractors; GG genotype: PTSD>TC<br>– rs25531: L amygdala activation, S allele carriers: PTSD>TC                                                                                                                      |
| Cole et al., 2011      | Depression (84)<br>Controls (111) |                                                     | MRI    | Hippocampus                                 | 5-HTTLPR (rs25531)             | – No gene or gene×diagnosis effects for shape or volume                                                                                                                                                                                                                                                                 |
| Eker et al., 2011      | Depression (44)<br>Controls (43)  |                                                     | MRI    | Hippocampus                                 | 5-HTTLPR (rs25531)             | – Diagnosis×gene interaction for hippocampal volume; SS genotype: Depressed<controls                                                                                                                                                                                                                                    |
| Everaerd et al., 2012  | Controls (136 male, 221 female)   |                                                     | MRI    | Hippocampus                                 | 5-HTTLPR (rs25531)             | – G×E: within males, S-allele carriers: higher CA associated with lower volume<br>– Gene main effects: females, hippocampal volume: S-allele carriers<L-allele carriers                                                                                                                                                 |
| Frodl et al., 2010     | Depression (24)<br>Controls (27)  |                                                     | MRI    | Hippocampus+ whole brain                    | 5-HTTLPR (rs25531)             | – S-allele carriers: emotional neglect history associated with lower hippocampal volume<br>– LL genotype: emotional neglect associated with larger dlPFC volume                                                                                                                                                         |
| Gatt et al., 2009      | Controls (89)                     | Cognitive battery (administered outside of scanner) | MRI    |                                             | BDNF (Val66Met)                | – G×E: Met carriers with ELS: smaller hippocampus, amygdala, lateral PFC volumes, poorer working memory<br>– Val/Val with ELS: greater amygdala volume associated with greater mPFC volume and higher anxiety                                                                                                           |



|                         |                                                         |                                                         |              |                                          |                                 |                                                                                                                                                                                                                   |
|-------------------------|---------------------------------------------------------|---------------------------------------------------------|--------------|------------------------------------------|---------------------------------|-------------------------------------------------------------------------------------------------------------------------------------------------------------------------------------------------------------------|
| Carballedo et al., 2013 | Depression (62)<br>Controls (71)                        |                                                         | MRI          | Hippocampus                              | <i>BDNF</i><br>(Val66Met)       | – G×E for hippocampal volume: Met carriers with ELS<Met carriers without ELS<br>– Met carriers without ELS>Val/Val without ELS<br>– No gene or gene×diagnosis effects for volume or shape                         |
| Cole et al., 2011       | Depression (84)<br>Controls (111)                       |                                                         | MRI          | Hippocampus                              | <i>BDNF</i><br>(Val66Met)       | – No gene or gene×diagnosis effects for volume or shape                                                                                                                                                           |
| Mueller et al., 2013    | Adolescents:<br>anxiety disorder (39),<br>Controls (63) |                                                         | MRI          | Hippocampus,<br>amygdala,<br>insula, ACC | <i>BDNF</i><br>(Val66Met)       | – Diagnosis×gene interactions; R insula: anxious Met carriers<anxious Val/Val;<br>ACC: anxious Val/Val<healthy Val/Val                                                                                            |
| White et al., 2012      | Adolescent controls (139)                               | Face matching task (angry and fearful faces vs. shapes) | fMRI         | Amygdala                                 | <i>FKBP5</i><br>(multiple snps) | – G×E: greater amygdala activation in risk alleles carriers with history of emotional neglect (snps: rs9394309, rs7748266, rs1360780, rs9296158, rs3800373 rs9470080)                                             |
| Fani et al., 2013       | PTSD (15),<br>controls (21),<br>all female              | Attention bias task (dot probe)                         | fMRI,<br>MRI | Hippocampus                              | <i>FKBP5</i><br>(rs1360780)     | –T (risk) allele carriers vs. CC genotype: greater attention bias towards threat, corresponding increases in hippocampal activation and differences in hippocampal morphology                                     |
| Domschke et al., 2008   | Panic disorder (12 female, 8 male)                      | Passive viewing of emotional facial expressions         | fMRI         | Amygdala,<br>vmPFC,<br>OFC, dlPFC, ACC   | <i>COMT</i><br>(rs4680)         | – Fearful vs. no faces: amygdala, L OFC, activation: Val-allele carriers> Met-allele carriers<br>– Angry vs. no faces: vmPFC: AG/GG (risk genotypes)>AA<br>– Happy vs. no faces: vmPFC: AG/GG (risk genotypes)>AA |
| Domschke et al., 2012   | Controls (34 male, 51 female)                           | Face matching task (angry and fearful faces vs. shapes) | fMRI         | Amygdala                                 | <i>COMT</i><br>(rs4680)         | – L amygdala activation in females: Val/val genotype>Met-allele carriers                                                                                                                                          |
| Domschke et al., 2010a  | Depression (35)                                         | Passive viewing of emotional facial expressions         | fMRI         | Amygdala                                 | <i>NPY</i> (rs16147)            | – Angry vs. neutral faces, amygdala activation: C-allele carriers>TT genotype                                                                                                                                     |
| Zhou et al., 2008       | Controls (71)                                           | Face matching task (angry and fearful faces vs. shapes) | fMRI         | Amygdala,<br>hippocampus                 | <i>NPY</i> (rs5574 haplotypes)  | – Amygdala and hippocampus activation: low-NPY-expression (LL) diplotype>high-expression (HH) diplotype                                                                                                           |

Abbreviations: ACC, anterior cingulate cortex; BDNF, brain-derived neurotrophic factor; CA, childhood abuse; COMT, catechol-O-methyltransferase; dlPFC, dorsolateral prefrontal cortex; ELS, early life stress; FKBP5, FK506 binding protein 5; fMRI, functional magnetic resonance imaging; G×E, gene by environment interaction; LPC, lateral parietal cortex; L, left; MRI, magnetic resonance imaging; mPFC, medial prefrontal cortex; NPY, neuropeptide Y; OFC, orbitofrontal cortex; PFC, prefrontal cortex; PTSD, post-traumatic stress disorder; R, right; 5-HTTLPR, serotonin-transporter-linked polymorphic region; TC, trauma controls; vlPFC, ventrolateral prefrontal cortex.

## Acknowledgments

This work was primarily supported by the National Institutes of Mental Health (MH071537 and MH096764 to K.J.R., MH095456 to N.F., and MH085806 to A.K.S.). Support was also received from Emory and Grady Memorial Hospital General Clinical Research Centre, NIH National Centres for Research Resources (M01RR00039), and Howard Hughes Medical Institute (K.J.R.).

## Financial disclosures

The authors declare no conflict of interest, financial or otherwise.

## References

Afifi TO, Asmundson GJ, Taylor S, Jang KL (2010) The role of genes and environment on trauma exposure and post-traumatic stress disorder symptoms: a review of twin studies. *Clin Psychol Rev* 30:101–112.

Alexander N, Klucken T, Koppe G, Osinsky R, Walter B, Vaitl D, Sammer G, Stark R, Hennig J (2012) Interaction of the serotonin transporter-linked polymorphic region and environmental adversity: increased amygdala-hypothalamus connectivity as a potential mechanism linking neural and endocrine hyperreactivity. *Biol Psychiatry* 72:49–56.

Almlı LM, Mercer KB, Kerley K, Feng H, Bradley B, Conneely KN, Ressler KJ (2013) ADCYAP1R1 genotype associates with post-traumatic stress symptoms in highly traumatized African-American females. *Am J Med Genet B Neuropsychiatr Genet* 162:262–272.

Amstadter AB (2012) Invited commentary on patho-genetics of post-traumatic stress disorder. *Psychiatr Danub* 24:276–277.

Amstadter AB, Nugent NR, Koenen KC (2009a) Genetics of PTSD: fear conditioning as a model for future research. *Psychiatr Ann* 39:358–367.

Amstadter AB, Koenen KC, Ruggiero KJ, Acierno R, Galea S, Kilpatrick DG, Gelernter J (2009b) Variant in RGS2 moderates post-traumatic stress symptoms following potentially traumatic event exposure. *J Anxiety Disord* 23:369–373.

Amstadter AB, Nugent NR, Yang BZ, Miller A, Sibirian R, Moorjani P, Haddad S, Basu A, Fagerness J, Saxe G, Smoller JW, Koenen KC (2011) Corticotrophin-releasing hormone type 1 receptor gene (CRHR1) variants predict post-traumatic stress disorder onset and course in pediatric injury patients. *Dis Markers* 30:89–99.

Amstadter AB, Sumner JA, Acierno R, Ruggiero KJ, Koenen KC, Kilpatrick DG, Galea S, Gelernter J (2013) Support for association of RORA variant and post traumatic stress symptoms in a population-based study of hurricane exposed adults. *Mol Psychiatry*. Advance online publication. Retrieved 15 Jan 2013. doi: 10.1038?mp.2012.189.

Andero R, Ressler KJ (2012) Fear extinction and BDNF: translating animal models of PTSD to the clinic. *Genes Brain Behav* 11:503–512.

Anger WK, Storzbach D, Binder LM, Campbell KA, Rohlman DS, McCauley L, Kovera CA, Davis KL (1999) Neurobehavioral deficits in Persian Gulf veterans: evidence from a

population-based study. *Portland Environmental Hazards Research Center. J Int Neuropsychol Soc* 5:203–212.

Annunziato A (2008) DNA packaging: nucleosomes and chromatin. *Nat Educ* 1:1.

Armony JL, Corbo V, Clement MH, Brunet A (2005) Amygdala response in patients with acute PTSD to masked and unmasked emotional facial expressions. *Am J Psychiatry* 162:1961–1963.

Bachmann AW, Sedgley TL, Jackson RV, Gibson JN, Young RM, Torpy DJ (2005) Glucocorticoid receptor polymorphisms and post-traumatic stress disorder. *Psychoneuroendocrinology* 30:297–306.

Bailey JN, Goenjian AK, Noble EP, Walling DP, Ritchie T, Goenjian HA (2010) PTSD and dopaminergic genes, DRD2 and DAT, in multigenerational families exposed to the Spitak earthquake. *Psychiatry Res* 178:507–510.

Bannister AJ, Kouzarides T (2011) Regulation of chromatin by histone modifications. *Cell Res* 21:381–395.

Binder EB, Bradley RG, Liu W, Epstein MP, Deveau TC, Mercer KB, Tang Y, Gillespie CF, Heim CM, Nemeroff CB, Schwartz AC, Cubells JF, Ressler KJ (2008) Association of FKBP5 polymorphisms and childhood abuse with risk of post-traumatic stress disorder symptoms in adults. *Jama* 299:1291–1305.

Bomyea J, Risbrough V, Lang AJ (2012) A consideration of select pre-trauma factors as key vulnerabilities in PTSD. *Clin Psychol Rev* 32:630–641.

Bonasio R, Tu S, Reinberg D (2010) Molecular signals of epigenetic states. *Science* 330:612–616.

Boscarino JA, Erlich PM, Hoffman SN, Rukstalis M, Stewart WF (2011) Association of FKBP5, COMT and CHRNA5 polymorphisms with PTSD among outpatients at risk for PTSD. *Psychiatry Res* 188:173–174.

Boscarino JA, Erlich PM, Hoffman SN, Zhang X (2012) Higher FKBP5, COMT, CHRNA5, and CRHR1 allele burdens are associated with PTSD and interact with trauma exposure: implications for neuropsychiatric research and treatment. *Neuropsychiatr Dis Treat* 8:131–139.

Bremner JD, Scott TM, Delaney RC, Southwick SM, Mason JW, Johnson DR, Innis RB, McCarthy G, Charney DS (1993) Deficits in short-term memory in post-traumatic stress disorder. *Am J Psychiatry* 150:1015–1019.

Bremner JD, Randall P, Scott TM, Bronen RA, Seibyl JP, Southwick SM, Delaney RC, McCarthy G, Charney DS, Innis RB (1995) MRI-based measurement of hippocampal volume in patients with combat-related post-traumatic stress disorder. *Am J Psychiatry* 152:973–981.

Bremner JD, Vermetten E, Afzal N, Vythilingam M (2004) Deficits in verbal declarative memory function in women with childhood sexual abuse-related post-traumatic stress disorder. *J Nerv Ment Dis* 192:643–649.

Broekman BF, Olff M, Boer F (2007) The genetic background to PTSD. *Neurosci Biobehav Rev* 31:348–362.

Brunello N, Davidson JR, Deahl M, Kessler RC, Mendlewicz J, Racagni G, Shalev AY, Zohar J (2001) Post-traumatic stress disorder: diagnosis and epidemiology, comorbidity and social consequences, biology and treatment. *Neuropsychobiology* 43:150–162.

Bryant RA, Harvey AG (1997) Attentional bias in post-traumatic stress disorder. *J Trauma Stress* 10:635–644.

- Bryant RA, Felmingham K, Kemp A, Das P, Hughes G, Peduto A, Williams L (2008a) Amygdala and ventral anterior cingulate activation predicts treatment response to cognitive behaviour therapy for post-traumatic stress disorder. *Psychol Med* 38:555–561.
- Bryant RA, Kemp AH, Felmingham KL, Liddell B, Olivieri G, Peduto A, Gordon E, Williams LM (2008b) Enhanced amygdala and medial prefrontal activation during nonconscious processing of fear in post-traumatic stress disorder: an fMRI study. *Hum Brain Mapp* 29:517–523.
- Carballedo A, Morris D, Zill P, Fahey C, Reinhold E, Meisenzahl E, Bondy B, Gill M, Moller HJ, Frodl T (2013) Brain-derived neurotrophic factor Val66Met polymorphism and early life adversity affect hippocampal volume. *Am J Med Genet B Neuropsychiatr Genet* 162B:183–190.
- Caspi A, Sugden K, Moffitt TE, Taylor A, Craig IW, Harrington H, McClay J, Mill J, Martin J, Braithwaite A, Poulton R (2003) Influence of life stress on depression: moderation by a polymorphism in the 5-HTT gene. *Science* 301:386–389.
- Chang SC, Koenen KC, Galea S, Aiello AE, Soliven R, Wildman DE, Uddin M (2012a) Molecular variation at the SLC6A3 locus predicts lifetime risk of PTSD in the Detroit Neighborhood Health Study. *PLoS ONE* 7:e39184.
- Chang SC, Xie P, Anton RF, De Vivo I, Farrer LA, Kranzler HR, Oslin D, Purcell SM, Roberts AL, Smoller JW, Uddin M, Gelernter J, Koenen KC (2012b) No association between ADCYAP1R1 and post-traumatic stress disorder in two independent samples. *Mol Psychiatry* 17:239–241.
- Chhatwal JP, Stanek-Rattiner L, Davis M, Ressler KJ (2006) Amygdala BDNF signaling is required for consolidation but not encoding of extinction. *Nat Neurosci* 9:870–872.
- Cole J, Weinberger DR, Mattay VS, Cheng X, Toga AW, Thompson PM, Powell-Smith G, Cohen-Woods S, Simmons A, McGuffin P, Fu CH (2011) No effect of 5HTTLPR or BDNF Val66Met polymorphism on hippocampal morphology in major depression. *Genes Brain Behav* 10:756–764.
- Comings DE, Muhleman D, Gysin R (1996) Dopamine D2 receptor (DRD2) gene and susceptibility to post-traumatic stress disorder: a study and replication. *Biol Psychiatry* 40:368–372.
- Cornelis MC, Nugent NR, Amstadter AB, Koenen KC (2010) Genetics of post-traumatic stress disorder: review and recommendations for genome-wide association studies. *Curr Psychiatry Rep* 12:313–326.
- Cubells JF, Zabetian CP (2004) Human genetics of plasma dopamine beta-hydroxylase activity: applications to research in psychiatry and neurology. *Psychopharmacology (Berl)* 174:463–476.
- Dagleish T, Taghavi R, Neshat-Doost H, Moradi A, Canterbury R, Yule W (2003) Patterns of processing bias for emotional information across clinical disorders: a comparison of attention, memory, and prospective cognition in children and adolescents with depression, generalized anxiety, and post-traumatic stress disorder. *J Clin Child Adolesc Psychol* 32:10–21.
- Damsa C, Kosel M, Moussally J (2009) Current status of brain imaging in anxiety disorders. *Curr Opin Psychiatry* 22:96–110.
- Davies MN, Volta M, Pidsley R, Lunnon K, Dixit A, Lovestone S, Coarfa C, Harris RA, Milosavljevic A, Troakes C, Al-Sarraj S, Dobson R, Schalkwyk LC, Mill J (2012) Functional annotation of the human brain methylome identifies tissue-specific epigenetic variation across brain and blood. *Genome Biol* 13:R43.
- Delgado MR, Olsson A, Phelps EA (2006) Extending animal models of fear conditioning to humans. *Biol Psychol* 73:39–48.
- Digangi J, Guffanti G, McLaughlin KA, Koenen KC (2013) Considering trauma exposure in the context of genetics studies of post-traumatic stress disorder: a systematic review. *Biol Mood Anxiety Disord* 3:2.
- Domschke K (2012) Patho-genetics of post-traumatic stress disorder. *Psychiatria Danubina* 24:267–273.
- Domschke K, Dannlowski U (2010) Imaging genetics of anxiety disorders. *Neuroimage* 53:822–831.
- Domschke K, Ohrmann P, Braun M, Suslow T, Bauer J, Hohoff C, Kersting A, Engelen A, Arolt V, Heindel W, Deckert J, Kugel H (2008) Influence of the catechol-O-methyltransferase val158met genotype on amygdala and prefrontal cortex emotional processing in panic disorder. *Psychiatry Res* 163:13–20.
- Domschke K, Dannlowski U, Hohoff C, Ohrmann P, Bauer J, Kugel H, Zwanzger P, Heindel W, Deckert J, Arolt V, Suslow T, Baune BT (2010a) Neuropeptide Y (NPY) gene: impact on emotional processing and treatment response in anxious depression. *Eur Neuropsychopharmacol* 20:301–309.
- Domschke K, Dannlowski U, Hohoff C, Ohrmann P, Bauer J, Kugel H, Zwanzger P, Heindel W, Deckert J, Arolt V, Suslow T, Baune BT (2010b) Neuropeptide Y (NPY) gene: impact on emotional processing and treatment response in anxious depression. *Eur Neuropsychopharmacol* 20:301–309.
- Domschke K, Baune BT, Havlik L, Stuhmann A, Suslow T, Kugel H, Zwanzger P, Grotegerd D, Sehlmeier C, Arolt V, Dannlowski U (2012) Catechol-O-methyltransferase gene variation: impact on amygdala response to aversive stimuli. *Neuroimage* 60:2222–2229.
- Drabant EM, Ramel W, Edge MD, Hyde LW, Kuo JR, Goldin PR, Hariri AR, Gross JJ (2012) Neural mechanisms underlying 5-HTTLPR-related sensitivity to acute stress. *Am J Psychiatry* 169:397–405.
- Dretsch MN, Thiel KJ, Athy JR, Irvin CR, Sirmon-Fjordbak B, Salvatore A (2012) Mood symptoms contribute to working memory decrement in active-duty soldiers being treated for post-traumatic stress disorder. *Brain Behav* 2:357–364.
- Drury SS, Theall KP, Keats BJ, Scheeringa M (2009) The role of the dopamine transporter (DAT) in the development of PTSD in preschool children. *J Trauma Stress* 22:534–539.
- Eker MC, Kitis O, Okur H, Eker OD, Ozan E, Isikli S, Akarsu N, Gonul AS (2011) Smaller hippocampus volume is associated with short variant of 5-HTTLPR polymorphism in medication-free major depressive disorder patients. *Neuropsychobiology* 63:22–28.
- Everaerd D, Gerritsen L, Rijpkema M, Frodl T, van Oostrom I, Franke B, Fernandez G, Tendolcar I (2012) Sex modulates the interactive effect of the serotonin transporter gene polymorphism and childhood adversity on hippocampal volume. *Neuropsychopharmacology* 37:1848–1855.
- Fani N, Tone EB, Phifer J, Norrholm SD, Bradley B, Ressler KJ, Kamkwala A, Jovanovic T (2012) Attention bias toward threat is associated with exaggerated fear expression and impaired extinction in PTSD. *Psychol Med* 42:533–543.
- Fani N, Gutman D, Tone EB, Almlil L, Mercer KB, Davis J, Glover E, Jovanovic T, Bradley B, Dinov ID, Zamanyan A,

- Toga AW, Binder EB, Ressler KJ (2013) FKBP5 and attention bias for threat: associations with hippocampal function and shape. *JAMA Psychiatry* 70:392–400.
- Feil R, Fraga MF (2011) Epigenetics and the environment: emerging patterns and implications. *Nat Rev Genet* 13:97–109.
- Feinberg AP (2007) Phenotypic plasticity and the epigenetics of human disease. *Nature* 447:433–440.
- Felmingham KL, Dobson-Stone C, Schofield PR, Quirk GJ, Bryant RA (2013) The brain-derived neurotrophic factor Val66Met polymorphism predicts response to exposure therapy in post-traumatic stress disorder. *Biol Psychiatry* 73:1059–1063.
- Freeman T, Roca V, Guggenheim F, Kimbrell T, Griffin WS (2005) Neuropsychiatric associations of apolipoprotein E alleles in subjects with combat-related post-traumatic stress disorder. *J Neuropsychiatry Clin Neurosci* 17:541–543.
- Frodl T, Reinhold E, Koutsouleris N, Donohoe G, Bondy B, Reiser M, Moller HJ, Meisenzahl EM (2010) Childhood stress, serotonin transporter gene and brain structures in major depression. *Neuropsychopharmacology* 35:1383–1390.
- Garriock HA, Kraft JB, Shyn SI, Peters EJ, Yokoyama JS, Jenkins GD, Reinalda MS, Slager SL, McGrath PJ, Hamilton SP (2010) A genomewide association study of citalopram response in major depressive disorder. *Biol Psychiatry* 67:133–138.
- Gatt JM, Nemeroff CB, Dobson-Stone C, Paul RH, Bryant RA, Schofield PR, Gordon E, Kemp AH, Williams LM (2009) Interactions between BDNF Val66Met polymorphism and early life stress predict brain and arousal pathways to syndromal depression and anxiety. *Mol Psychiatry* 14:681–695.
- Gelernter J, Southwick S, Goodson S, Morgan A, Nagy L, Charney DS (1999) No association between D2 dopamine receptor (DRD2) “A” system alleles, or DRD2 haplotypes, and post-traumatic stress disorder. *Biol Psychiatry* 45:620–625.
- Ghebranious N, Ivacic L, Mallum J, Dokken C (2005) Detection of ApoE E2, E3 and E4 alleles using MALDI-TOF mass spectrometry and the homogeneous mass-extend technology. *Nucleic Acids Res* 33:e149.
- Gilbertson MW, Gurvits TV, Lasko NB, Orr SP, Pitman RK (2001) Multivariate assessment of explicit memory function in combat veterans with post-traumatic stress disorder. *J Trauma Stress* 14:413–432.
- Gillespie CF, Phifer J, Bradley B, Ressler KJ (2009a) Risk and resilience: genetic and environmental influences on development of the stress response. *Depress Anxiety* 26:984–992.
- Gillespie CF, Bradley B, Mercer K, Smith AK, Conneely K, Gapen M, Weiss T, Schwartz AC, Cubells JF, Ressler KJ (2009b) Trauma exposure and stress-related disorders in inner city primary care patients. *Gen Hosp Psychiatry* 31:505–514.
- Glahn DC, Thompson PM, Blangero J (2007) Neuroimaging endophenotypes: strategies for finding genes influencing brain structure and function. *Hum Brain Mapp* 28:488–501.
- Gottesman II, Gould TD (2003) The endophenotype concept in psychiatry: etymology and strategic intentions. *Am J Psychiatry* 160:636–645.
- Grabe HJ, Spitzer C, Schwahn C, Marcinek A, Frahnow A, Barnow S, Lucht M, Freyberger HJ, John U, Wallaschowski H, Volzke H, Roskopf D (2009) Serotonin transporter gene (SLC6A4) promoter polymorphisms and the susceptibility to post-traumatic stress disorder in the general population. *Am J Psychiatry* 166:926–933.
- Grandy DK, Litt M, Allen L, Bunzow JR, Marchionni M, Makam H, Reed L, Magenis RE, Civelli O (1989) The human dopamine D2 receptor gene is located on chromosome 11 at q22–q23 and identifies a TaqI RFLP. *Am J Hum Genet* 45:778–785.
- Gutman AR, Yang Y, Ressler KJ, Davis M (2008) The role of neuropeptide Y in the expression and extinction of fear-potentiated startle. *J Neurosci* 28:12682–12690.
- Hamner MB, Diamond BI (1993) Elevated plasma dopamine in post-traumatic stress disorder: a preliminary report. *Biol Psychiatry* 33:304–306.
- Heijmans BT, Tobi EW, Stein AD, Putter H, Blauw GJ, Susser ES, Slagboom PE, Lumey LH (2008) Persistent epigenetic differences associated with prenatal exposure to famine in humans. *Proc Natl Acad Sci USA* 105:17046–17049.
- Heldt SA, Stanek L, Chhatwal JP, Ressler KJ (2007) Hippocampus-specific deletion of BDNF in adult mice impairs spatial memory and extinction of aversive memories. *Mol Psychiatry* 12:656–670.
- Hemmings SM, Martin LI, Klopper M, van der Merwe L, Aitken L, de Wit E, Black GF, Hoal EG, Walz G, Seedat S (2013) BDNF Val66Met and DRD2 Taq1A polymorphisms interact to influence PTSD symptom severity: a preliminary investigation in a South African population. *Prog Neuropsychopharmacol Biol Psychiatry* 40:273–280.
- Kaabi B, Gelernter J, Woods SW, Goddard A, Page GP, Elston RC (2006) Genome scan for loci predisposing to anxiety disorders using a novel multivariate approach: strong evidence for a chromosome 4 risk locus. *Am J Hum Genet* 78:543–553.
- Karl A, Schaefer M, Malta LS, Dorfel D, Rohleder N, Werner A (2006) A meta-analysis of structural brain abnormalities in PTSD. *Neurosci Biobehav Rev* 30:1004–1031.
- Keane TM, Marx BP, Sloan DM, eds (2009) Post-traumatic stress disorder: definition, prevalence, and risk factors. New York: Humana Press.
- Kenna GA, Roder-Hanna N, Leggio L, Zywiak WH, Clifford J, Edwards S, Kenna JA, Shoaff J, Swift RM (2012) Association of the 5-HTT gene-linked promoter region (5-HTTLPR) polymorphism with psychiatric disorders: review of psychopathology and pharmacotherapy. *Pharmgenomics Pers Med* 5:19–35.
- Kilpatrick DG, Koenen KC, Ruggiero KJ, Acierno R, Galea S, Resnick HS, Roitzsch J, Boyle J, Gelernter J (2007) The serotonin transporter genotype and social support and moderation of post-traumatic stress disorder and depression in hurricane-exposed adults. *Am J Psychiat* 164:1693–1699.
- Kitayama N, Vaccarino V, Kutner M, Weiss P, Bremner JD (2005) Magnetic resonance imaging (MRI) measurement of hippocampal volume in post-traumatic stress disorder: a meta-analysis. *J Affect Disord* 88:79–86.
- Klengel T, Mehta D, Anacker C, Rex-Haffner M, Pruessner JC, Pariante CM, Pace TW, Mercer KB, Mayberg HS, Bradley B, Nemeroff CB, Holsboer F, Heim CM, Ressler KJ, Rein T, Binder EB (2013) Allele-specific FKBP5 DNA demethylation mediates gene-childhood trauma interactions. *Nat Neurosci* 16:33–41.
- Koenen KC, Lyons MJ, Goldberg J, Simpson J, Williams WM, Toomey R, Eisen SA, True WR, Cloitre M, Wolfe J, Tsuang MT (2003) A high risk twin study of combat-related PTSD comorbidity. *Twin Res* 6:218–226.
- Koenen KC, Hitsman B, Lyons MJ, Niaura R, McCaffery J, Goldberg J, Eisen SA, True W, Tsuang M (2005) A twin

- registry study of the relationship between post-traumatic stress disorder and nicotine dependence in men. *Arch Gen Psychiatry* 62:1258–1265.
- Koenen KC, Aiello AE, Bakshis E, Amstadter AB, Ruggiero KJ, Acierno R, Kilpatrick DG, Gelernter J, Galea S (2009) Modification of the association between serotonin transporter genotype and risk of post-traumatic stress disorder in adults by county-level social environment. *Am J Epidemiol* 169:704–711.
- Koenen KC, Uddin M, Chang SC, Aiello AE, Wildman DE, Goldmann E, Galea S (2011) SLC6A4 methylation modifies the effect of the number of traumatic events on risk for post-traumatic stress disorder. *Depress Anxiety* 28:639–647.
- Kolassa IT, Kolassa S, Ertl V, Papassotiropoulos A, De Quervain DJ (2010a) The risk of post-traumatic stress disorder after trauma depends on traumatic load and the catechol-o-methyltransferase Val(158)Met polymorphism. *Biol Psychiatry* 67:304–308.
- Kolassa IT, Ertl V, Eckart C, Glockner F, Kolassa S, Papassotiropoulos A, de Quervain DJF, Elbert T (2010b) Association study of Trauma load and SLC6A4 promoter polymorphism in post-traumatic stress disorder: evidence from survivors of the rwandan genocide. *J Clin Psychiat* 71:543–547.
- Koso M, Hansen S (2006) Executive function and memory in post-traumatic stress disorder: a study of Bosnian war veterans. *Eur Psychiatry* 21:167–173.
- Lachman HM, Papolos DF, Saito T, Yu YM, Szumlanski CL, Weinshilboum RM (1996) Human catechol-O-methyltransferase pharmacogenetics: description of a functional polymorphism and its potential application to neuropsychiatric disorders. *Pharmacogenetics* 6:243–250.
- Lam LL, Emberly E, Fraser HB, Neumann SM, Chen E, Miller GE, Kobor MS (2012) Factors underlying variable DNA methylation in a human community cohort. *Proc Natl Acad Sci USA* 109(Suppl. 2):17253–17260.
- Lappalainen J, Kranzler HR, Malison R, Price LH, Van Dyck C, Rosenheck RA, Cramer J, Southwick S, Charney D, Krystal J, Gelernter J (2002) A functional neuropeptide Y Leu7Pro polymorphism associated with alcohol dependence in a large population sample from the United States. *Arch Gen Psychiatry* 59:825–831.
- Le-Niculescu H, Patel SD, Bhat M, Kuczenski R, Faraone SV, Tsuang MT, McMahon FJ, Schork NJ, Numberger JI Jr., Niculescu AB III, (2009) Convergent functional genomics of genome-wide association data for bipolar disorder: comprehensive identification of candidate genes, pathways and mechanisms. *Am J Med Genet B Neuropsychiatr Genet* 150B:155–181.
- Lee HJ, Lee MS, Kang RH, Kim H, Yim SD, Kee BS, Kim YH, Kim YK, Kim JB, Yeon BK, Oh KS, Oh BH, Yoon JS, Lee C, Jung HY, Chee IS, Paik IH (2005) Influence of the serotonin transporter promoter gene polymorphism on susceptibility to post-traumatic stress disorder. *Depress Anxiety* 21:135–139.
- Lee HJ, Kang RH, Lim SW, Paik JW, Choi MJ, Lee MS (2006) Short communication: no association between the brain-derived neurotrophic factor gene Val66Met polymorphism and post-traumatic stress disorder. *Stress Health* 22:115–119.
- Lee H-J, Kwak S-K, Paik J-W, Kang R-H, Lee M-S (2007) Association between serotonin 2A receptor gene polymorphism and post-traumatic stress disorder. *Psychiatry Investig* 4:104–108.
- Lesch KP, Bengel D, Heils A, Sabol SZ, Greenberg BD, Petri S, Benjamin J, Muller CR, Hamer DH, Murphy DL (1996) Association of anxiety-related traits with a polymorphism in the serotonin transporter gene regulatory region. *Science* 274:1527–1531.
- Leygraf A, Hohoff C, Freitag C, Willis-Owen SA, Krakowitzky P, Fritze J, Franke P, Bandelow B, Fimmers R, Flint J, Deckert J (2006) Rgs 2 gene polymorphisms as modulators of anxiety in humans? *J Neural Transm* 113:1921–1925.
- Logue MW, Baldwin C, Guffanti G, Melista E, Wolf EJ, Reardon AF, Uddin M, Wildman D, Galea S, Koenen KC, Miller MW (2013) A genome-wide association study of post-traumatic stress disorder identifies the retinoid-related orphan receptor alpha (RORA) gene as a significant risk locus. *Mol Psychiatry* 18:937–942.
- Lonsdorf TB, Weike AI, Nikamo P, Schalling M, Hamm AO, Ohman A (2009) Genetic gating of human fear learning and extinction: possible implications for gene-environment interaction in anxiety disorder. *Psychol Sci* 20:198–206.
- Lu AT, Ogdie MN, Jarvelin MR, Moilanen IK, Loo SK, McCracken JT, McGough JJ, Yang MH, Peltonen L, Nelson SF, Cantor RM, Smalley SL (2008) Association of the cannabinoid receptor gene (CNR1) with ADHD and post-traumatic stress disorder. *Am J Med Genet B Neuropsychiatr Genet* 147B:1488–1494.
- Martin EJ, Ressler KJ, Binder E, Nemeroff CB (2009) The neurobiology of anxiety disorders: brain imaging, genetics, and psychoneuroendocrinology. *Psychiatr Clin North Am* 32:549–575.
- Maunakea AK et al. (2010) Conserved role of intragenic DNA methylation in regulating alternative promoters. *Nature* 466:253–257.
- McGowan PO, Sasaki A, D'Alessio AC, Dymov S, Labonte B, Szyf M, Turecki G, Meaney MJ (2009) Epigenetic regulation of the glucocorticoid receptor in human brain associates with childhood abuse. *Nat Neurosci* 12:342–348.
- Mehta D, Binder EB (2012) Gene x environment vulnerability factors for PTSD: the HPA-axis. *Neuropharmacology* 62:654–662.
- Mehta D, Gonik M, Klengel T, Rex-Haffner M, Menke A, Rubel J, Mercer KB, Putz B, Bradley B, Holsboer F, Ressler KJ, Muller-Myhsok B, Binder EB (2011) Using polymorphisms in FKBP5 to define biologically distinct subtypes of post-traumatic stress disorder: evidence from endocrine and gene expression studies. *Arch Gen Psychiatry* 68:901–910.
- Mehta D, Klengel T, Conneely KN, Smith AK, Altmann A, Pace TW, Rex-Haffner M, Loeschner A, Gonik M, Mercer KB, Bradley B, Muller-Myhsok B, Ressler KJ, Binder EB (2013) Childhood maltreatment is associated with distinct genomic and epigenetic profiles in post-traumatic stress disorder. *Proc Natl Acad Sci USA* 110:8302–8307.
- Mellman TA, Alim T, Brown DD, Gorodetsky E, Buzas B, Lawson WB, Goldman D, Charney DS (2009) Serotonin polymorphisms and post-traumatic stress disorder in a Trauma exposed African American population. *Depress Anxiety* 26:993–997.
- Mercer KB, Orcutt HK, Quinn JF, Fitzgerald CA, Conneely KN, Barfield RT, Gillespie CF, Ressler KJ (2012) Acute and post-traumatic stress symptoms in a prospective gene x environment study of a university campus shooting. *Arch Gen Psychiatry* 69:89–97.

- Meyer-Lindenberg A, Weinberger DR (2006) Intermediate phenotypes and genetic mechanisms of psychiatric disorders. *Nat Rev Neurosci* 7:818–827.
- Morey RA, Hariri AR, Gold AL, Hauser MA, Munger HJ, Dolcos F, McCarthy G (2011) Serotonin transporter gene polymorphisms and brain function during emotional distraction from cognitive processing in post-traumatic stress disorder. *BMC Psychiatry* 11:76.
- Mueller SC, Aouidad A, Gorodetsky E, Goldman D, Pine DS, Ernst M (2013) Gray matter volume in adolescent anxiety: an impact of the brain-derived neurotrophic factor Val(66) Met polymorphism? *J Am Acad Child Adolesc Psychiatry* 52:184–195.
- Mustapic M, Pivac N, Kozaric-Kovacic D, Dezeljin M, Cubells JF, Muck-Seler D (2007) Dopamine beta-hydroxylase (DBH) activity and -1021C/T polymorphism of DBH gene in combat-related post-traumatic stress disorder. *Am J Med Genet B Neuropsychiatr Genet* 144B:1087–1089.
- Nakamura M, Ueno S, Sano A, Tanabe H (2000) The human serotonin transporter gene linked polymorphism (5-HTTLPR) shows ten novel allelic variants. *Mol Psychiatry* 5:32–38.
- Neale BM et al. (2008) Genome-wide association scan of attention deficit hyperactivity disorder. *Am J Med Genet B Neuropsychiatr Genet* 147B:1337–1344.
- Nelson EC, Agrawal A, Pergadia ML, Lynskey MT, Todorov AA, Wang JC, Todd RD, Martin NG, Heath AC, Goate AM, Montgomery GW, Madden PA (2009) Association of childhood trauma exposure and GABRA2 polymorphisms with risk of post-traumatic stress disorder in adults. *Mol Psychiatry* 14:234–235.
- Nguyen A, Rauch TA, Pfeifer GP, Hu VW (2010) Global methylation profiling of lymphoblastoid cell lines reveals epigenetic contributions to autism spectrum disorders and a novel autism candidate gene, RORA, whose protein product is reduced in autistic brain. *FASEB J* 24:3036–3051.
- Norrholm SD, Ressler KJ (2009) Genetics of anxiety and trauma-related disorders. *Neuroscience* 164:272–287.
- Norrholm SD, Jovanovic T, Smith AK, Binder E, Klengel T, Conneely K, Mercer KB, Davis JS, Kerley K, Winkler J, Gillespie CF, Bradley B, Ressler KJ (2013) Differential genetic and epigenetic regulation of catechol-O-methyltransferase is associated with impaired fear inhibition in post-traumatic stress disorder. *Front Behav Neurosci* 7:30.
- Oberlander TF, Weinberg J, Papsdorf M, Grunau R, Misri S, Devlin AM (2008) Prenatal exposure to maternal depression, neonatal methylation of human glucocorticoid receptor gene (NR3C1) and infant cortisol stress responses. *Epigenetics* 3:97–106.
- Olf M, Langeland W, Gersons BP (2005) The psychobiology of PTSD: coping with trauma. *Psychoneuroendocrinology* 30:974–982.
- Oreland L (2004) Platelet monoamine oxidase, personality and alcoholism: the rise, fall and resurrection. *Neurotoxicology* 25:79–89.
- Pivac N, Knezevic J, Kozaric-Kovacic D, Dezeljin M, Mustapic M, Rak D, Matijevic T, Pavelic J, Muck-Seler D (2007) Monoamine oxidase (MAO) intron 13 polymorphism and platelet MAO-B activity in combat-related post-traumatic stress disorder. *J Affect Disord* 103:131–138.
- Poulton R, Andrews G, Millichamp J (2008) Gene-environment interaction and the anxiety disorders. *Eur Arch Psychiatry Clin Neurosci* 258:65–68.
- Pratchett LC, Pelcovitz MR, Yehuda R (2010) Trauma and violence: are women the weaker sex? *Psychiatr Clin North Am* 33:465–474.
- Psychiatric GWAS Consortium Coordinating Committee (2009) Genomewide Association Studies: History, Rationale, and Prospects for Psychiatric Disorders. *Am J Psychiatry* 166:540–556.
- Radant A, Tsuang D, Peskind ER, McFall M, Raskind W (2001) Biological markers and diagnostic accuracy in the genetics of post-traumatic stress disorder. *Psychiatry Res* 102:203–215.
- Rauch SL, Whalen PJ, Shin LM, McInerney SC, Macklin ML, Lasko NB, Orr SP, Pitman RK (2000) Exaggerated amygdala response to masked facial stimuli in post-traumatic stress disorder: a functional MRI study. *Biol Psychiatry* 47:769–776.
- Ressler KJ, Mercer KB, Bradley B, Jovanovic T, Mahan A, Kerley K, Norrholm SD, Kilaru V, Smith AK, Myers AJ, Ramirez M, Engel A, Hammack SE, Toufexis D, Braas KM, Binder EB, May V (2011) Post-traumatic stress disorder is associated with PACAP and the PAC1 receptor. *Nature* 470:492–497.
- Roseboom T, de Rooij S, Painter R (2006) The Dutch famine and its long-term consequences for adult health. *Early Hum Dev* 82:485–491.
- Roth TL, Lubin FD, Funk AJ, Sweatt JD (2009) Lasting epigenetic influence of early-life adversity on the BDNF gene. *Biol Psychiatry* 65:760–769.
- Rothbaum BO, Foa EB, Riggs DS, Murdock T, Walsh W (1992) A prospective examination of post-traumatic-stress-disorder in rape victims. *J Trauma Stress* 5:455–475.
- Ruchkin VV, Kuposov RA, af Klinteberg B, Oreland L, Grigorenko EL (2005) Platelet MAO-B, personality, and psychopathology. *J Abnorm Psychol* 114:477–482.
- Rusiecki JA, Chen L, Srikantan V, Zhang L, Yan L, Polin ML, Baccarelli A (2012) DNA methylation in repetitive elements and post-traumatic stress disorder: a case-control study of US military service members. *Epigenomics* 4:29–40.
- Sah R, Geraciotti TD (2013) Neuropeptide Y and post traumatic stress disorder. *Mol Psychiatry* 18:646–655.
- Samuelson KW, Neylan TC, Metzler TJ, Lenoci M, Rothlind J, Henn-Haase C, Choucroun G, Weiner MW, Marmar CR (2006) Neuropsychological functioning in post-traumatic stress disorder and alcohol abuse. *Neuropsychology* 20:716–726.
- Sarapas C, Cai G, Bierer LM, Golier JA, Galea S, Ising M, Rein T, Schmeidler J, Muller-Myhsok B, Uhr M, Holsboer F, Buxbaum JD, Yehuda R (2011) Genetic markers for PTSD risk and resilience among survivors of the World Trade Center attacks. *Dis Markers* 30:101–110.
- Sayin A, Kucukyildirim S, Akar T, Bakaloglu Z, Demircan A, Kurtoglu G, Demirel B, Candansayar S, Mergen H (2010) A prospective study of serotonin transporter gene promoter (5-HTT gene linked polymorphic region) and intron 2 (variable number of Tandem repeats) polymorphisms as predictors of Trauma response to mild physical injury. *DNA Cell Biol* 29:71–77.
- Scammell JG, Denny WB, Valentine DL, Smith DF (2001) Overexpression of the FK506-binding immunophilin FKBP51 is the common cause of glucocorticoid resistance in three New World primates. *Gen Comp Endocrinol* 124:152–165.
- Schalling D, Asberg M, Edman G, Oreland L (1987) Markers for vulnerability to psychopathology: temperament traits

- associated with platelet MAO activity. *Acta Psychiatr Scand* 76:172–182.
- Schweizer S, Dalgleish T (2011) Emotional working memory capacity in post-traumatic stress disorder (PTSD). *Behav Res Ther* 49:498–504.
- Segman RH, Cooper-Kazaz R, Macciardi F, Goltser T, Halfon Y, Dobroborski T, Shalev AY (2002) Association between the dopamine transporter gene and post-traumatic stress disorder. *Mol Psychiatry* 7:903–907.
- Segman RH, Shefi N, Goltser-Dubner T, Friedman N, Kaminski N, Shalev AY (2005) Peripheral blood mononuclear cell gene expression profiles identify emergent post-traumatic stress disorder among trauma survivors. *Mol Psychiatry* 10:500–513, 425.
- Sen S, Nesse RM, Stoltenberg SF, Li S, Gleiberman L, Chakravarti A, Weder AB, Burmeister M (2003) A BDNF coding variant is associated with the NEO personality inventory domain neuroticism, a risk factor for depression. *Neuropsychopharmacology* 28:397–401.
- Shin LM, Wright CI, Cannistraro PA, Wedig MM, McMullin K, Martis B, Macklin ML, Lasko NB, Cavanagh SR, Krangel TS, Orr SP, Pitman RK, Whalen PJ, Rauch SL (2005) A functional magnetic resonance imaging study of amygdala and medial prefrontal cortex responses to overtly presented fearful faces in post-traumatic stress disorder. *Arch Gen Psychiatry* 62:273–281.
- Skelton K, Ressler KJ, Norrholm SD, Jovanovic T, Bradley-Davino B (2012) PTSD and gene variants: new pathways and new thinking. *Neuropharmacology* 62:628–637.
- Smith AK, Conneely KN, Kilaru V, Mercer KB, Weiss TE, Bradley B, Tang Y, Gillespie CF, Cubells JF, Ressler KJ (2011) Differential immune system DNA methylation and cytokine regulation in post-traumatic stress disorder. *Am J Med Genet B Neuropsychiatr Genet* 156B:700–708.
- Smoller JW, Paulus MP, Fagerness JA, Purcell S, Yamaki LH, Hirshfeld-Becker D, Biederman J, Rosenbaum JF, Gelernter J, Stein MB (2008) Influence of RGS2 on anxiety-related temperament, personality, and brain function. *Arch Gen Psychiatry* 65:298–308.
- Soliman F, Glatt CE, Bath KG, Levita L, Jones RM, Pattwell SS, Jing D, Tottenham N, Amso D, Somerville LH, Voss HU, Glover G, Ballon DJ, Liston C, Teslovich T, Van Kempen T, Lee FS, Casey BJ (2010) A genetic variant BDNF polymorphism alters extinction learning in both mouse and human. *Science* 327:863–866.
- Southwick SM, Bremner D, Krystal JH, Charney DS (1994) Psychobiologic research in post-traumatic stress disorder. *Psychiatr Clin North Am* 17:251–264.
- Stein AD, Pierik FH, Verrips GH, Susser ES, Lumey LH (2009) Maternal exposure to the Dutch famine before conception and during pregnancy: quality of life and depressive symptoms in adult offspring. *Epidemiology* 20:909–915.
- Stein MB, Kennedy CM, Twamley EW (2002a) Neuropsychological function in female victims of intimate partner violence with and without post-traumatic stress disorder. *Biol Psychiatry* 52:1079–1088.
- Stein MB, Jang KL, Taylor S, Vernon PA, Livesley WJ (2002b) Genetic and environmental influences on trauma exposure and post-traumatic stress disorder symptoms: a twin study. *Am J Psychiatry* 159:1675–1681.
- Tang YL, Li W, Mercer K, Bradley B, Gillespie CF, Bonsall R, Ressler KJ, Cubells JF (2010) Genotype-controlled analysis of serum dopamine beta-hydroxylase activity in civilian post-traumatic stress disorder. *Prog Neuropsychopharmacol Biol Psychiatry* 34:1396–1401.
- Thakur GA, Joober R, Brunet A (2009) Development and persistence of post-traumatic stress disorder and the 5-HTTLPR polymorphism. *J Trauma Stress* 22:240–243.
- Trevillion K, Oram S, Feder G, Howard LM (2012) Experiences of domestic violence and mental disorders: a systematic review and meta-analysis. *PLoS ONE* 7:e51740.
- True WR, Rice J, Eisen SA, Heath AC, Goldberg J, Lyons MJ, Nowak J (1993) A twin study of genetic and environmental contributions to liability for post-traumatic stress symptoms. *Arch Gen Psychiatry* 50:257–264.
- Uddin M, Aiello AE, Wildman DE, Koenen KC, Pawelec G, de Los Santos R, Goldmann E, Galea S (2010) Epigenetic and immune function profiles associated with post-traumatic stress disorder. *Proc Natl Acad Sci USA* 107:9470–9475.
- Uddin M, Chang SC, Zhang C, Ressler K, Mercer KB, Galea S, Keyes KM, McLaughlin KA, Wildman DE, Aiello AE, Koenen KC (2013) Adcyap1r1 genotype, post-traumatic stress disorder, and depression among women exposed to childhood maltreatment. *Depress Anxiety* 30:251–258.
- Uddo M, Vasterling JJ, Brailey K, Sutker PB (1993) Memory and attention in combat-related post-traumatic-stress-disorder (Ptds). *J Psychopathol Behav* 15:43–52.
- Valente NL, Vallada H, Cordeiro Q, Bressan RA, Andreoli SB, Mari JJ, Mello MF (2011a) Catechol-O-methyltransferase (COMT) val158met polymorphism as a risk factor for PTSD after urban violence. *J Mol Neurosci* 43:516–523.
- Valente NL, Vallada H, Cordeiro Q, Miguita K, Bressan RA, Andreoli SB, Mari JJ, Mello MF (2011b) Candidate-gene approach in post-traumatic stress disorder after urban violence: association analysis of the genes encoding serotonin transporter, dopamine transporter, and BDNF. *J Mol Neurosci* 44:59–67.
- van Zuiden M, Kavelaars A, Geuze E, Olf M, Heijnen CJ (2013) Predicting PTSD: pre-existing vulnerabilities in glucocorticoid-signaling and implications for preventive interventions. *Brain Behav Immun* 30:12–21.
- Vandenberg DJ, Persico AM, Hawkins AL, Griffin CA, Li X, Jabs EW, Uhl GR (1992) Human dopamine transporter gene (DAT1) maps to chromosome 5p15.3 and displays a VNTR. *Genomics* 14:1104–1106.
- Vasterling JJ, Brailey K, Constans JJ, Sutker PB (1998) Attention and memory dysfunction in post-traumatic stress disorder. *Neuropsychology* 12:125–133.
- Vasterling JJ, Duke LM, Brailey K, Constans JJ, Allain AN Jr., Sutker PB (2002) Attention, learning, and memory performances and intellectual resources in Vietnam veterans: PTSD and no disorder comparisons. *Neuropsychology* 16:5–14.
- Vaudry D, Falluel-Morel A, Bourgault S, Basille M, Burel D, Wurtz O, Fournier A, Chow BK, Hashimoto H, Galas L, Vaudry H (2009) Pituitary adenylate cyclase-activating polypeptide and its receptors: 20 years after the discovery. *Pharmacol Rev* 61:283–357.
- Wald I, Degnan KA, Gorodetsky E, Charney DS, Fox NA, Fruchter E, Goldman D, Lubin G, Pine DS, Bar-Haim Y (2013) Attention to threats and combat-related post-traumatic stress symptoms: prospective associations and moderation by the serotonin transporter gene. *JAMA Psychiatry* 70:401–408.
- Wang Z, Baker DG, Harrer J, Hamner M, Price M, Amstadter A (2011) The relationship between combat-related post-traumatic

- stress disorder and the 5-HTTLPR/rs25531 polymorphism. *Depress Anxiety* 28:1067–1073.
- Weiss T, Skelton K, Phifer J, Jovanovic T, Gillespie CF, Smith A, Umpierrez G, Bradley B, Ressler KJ (2011) Post-traumatic stress disorder is a risk factor for metabolic syndrome in an impoverished urban population. *Gen Hosp Psychiatry* 33:135–142.
- White MG, Bogdan R, Fisher PM, Munoz KE, Williamson DE, Hariri AR (2012) FKBP5 and emotional neglect interact to predict individual differences in amygdala reactivity. *Genes Brain Behav* 11:869–878.
- Xian H, Chantarujikapong SI, Scherrer JF, Eisen SA, Lyons MJ, Goldberg J, Tsuang M, True WR (2000) Genetic and environmental influences on post-traumatic stress disorder, alcohol and drug dependence in twin pairs. *Drug Alcohol Depend* 61:95–102.
- Xie P, Kranzler HR, Poling J, Stein MB, Anton RF, Farrer LA, Gelernter J (2010) Interaction of FKBP5 with childhood adversity on risk for post-traumatic stress disorder. *Neuropsychopharmacology* 35:1684–1692.
- Xie P, Kranzler HR, Farrer L, Gelernter J (2012) Serotonin transporter 5-HTTLPR genotype moderates the effects of childhood adversity on post-traumatic stress disorder risk: a replication study. *Am J Med Genet B Neuropsychiatr Genet* 159B:644–652.
- Xie PX, Kranzler HR, Poling J, Stein MB, Anton RF, Brady K, Weiss RD, Farrer L, Gelernter J (2009) Interactive effect of stressful life events and the serotonin transporter 5-HTTLPR genotype on post-traumatic stress disorder diagnosis in 2 independent populations. *Arch Gen Psychiatry* 66:1201–1209.
- Yehuda R (2009) Status of glucocorticoid alterations in post-traumatic stress disorder. *Ann N Y Acad Sci* 1179:56–69.
- Yehuda R, Southwick S, Giller EL, Ma X, Mason JW (1992) Urinary catecholamine excretion and severity of PTSD symptoms in Vietnam combat veterans. *J Nerv Ment Dis* 180:321–325.
- Yehuda R, Southwick SM, Krystal JH, Bremner D, Charney DS, Mason JW (1993) Enhanced suppression of cortisol following dexamethasone administration in post-traumatic stress disorder. *Am J Psychiatry* 150:83–86.
- Yehuda R, Keefe RS, Harvey PD, Levengood RA, Gerber DK, Geni J, Siever LJ (1995) Learning and memory in combat veterans with post-traumatic stress disorder. *Am J Psychiatry* 152:137–139.
- Yehuda R, Engel SM, Brand SR, Seckl J, Marcus SM, Berkowitz GS (2005) Transgenerational effects of post-traumatic stress disorder in babies of mothers exposed to the World Trade Center attacks during pregnancy. *J Clin Endocrinol Metab* 90:4115–4118.
- Yehuda R, Cai G, Golier JA, Sarapas C, Galea S, Ising M, Rein T, Schmeidler J, Muller-Myhsok B, Holsboer F, Buxbaum JD (2009) Gene expression patterns associated with post-traumatic stress disorder following exposure to the World Trade Center attacks. *Biol Psychiatry* 66:708–711.
- Young RM, Lawford BR, Noble EP, Kann B, Wilkie A, Ritchie T, Arnold L, Shadforth S (2002) Harmful drinking in military veterans with post-traumatic stress disorder: association with the D2 dopamine receptor A1 allele. *Alcohol Alcohol* 37:451–456.
- Zabetian CP, Anderson GM, Buxbaum SG, Elston RC, Ichinose H, Nagatsu T, Kim KS, Kim CH, Malison RT, Gelernter J, Cubells JF (2001) A quantitative-trait analysis of human plasma-dopamine beta-hydroxylase activity: evidence for a major functional polymorphism at the DBH locus. *Am J Hum Genet* 68:515–522.
- Zhang H, Ozbay F, Lappalainen J, Kranzler HR, van Dyck CH, Charney DS, Price LH, Southwick S, Yang BZ, Rasmussen A, Gelernter J (2006) Brain derived neurotrophic factor (BDNF) gene variants and Alzheimer's disease, affective disorders, post-traumatic stress disorder, schizophrenia, and substance dependence. *Am J Med Genet B Neuropsychiatr Genet* 141B:387–393.
- Zhang L, Benedek DM, Fullerton CS, Forsten RD, Naifeh JA, Li XX, Hu XZ, Li H, Jia M, Xing GQ, Benevides KN, Ursano RJ (2013) PTSD risk is associated with BDNF Val66Met and BDNF overexpression. *Mol Psychiatry*. Advance online publication. Retrieved 15 Jan 2013. doi:10.1038/mp.2012.180.
- Zhou Z et al. (2008) Genetic variation in human NPY expression affects stress response and emotion. *Nature* 452:997–1001.
- Zovkic IB, Sweatt JD (2013) Epigenetic mechanisms in learned fear: implications for PTSD. *Neuropsychopharmacology* 38:77–93.
